# Supplementary material for: Niche as a Determinant of Word Fate in Online Groups
Source: PubMed Central journal article supplement (PMC3093376; doi:10.1371/journal.pone.0019009), 2011-05-12
Supplement: pone.0019009.s001.pdf [file pone.0019009.s001.pdf]

## Supporting Information S1

### Text S1. Filtering of data

In order to avoid spam present in the database, we eliminate all threads composed by a single post unless the author posted at least 5 times in threads with more than one post. Inside each post we consider only new inputs to the text, i.e., we omit parts of the text quoted from previous posts. Signature blocks (texts systematically placed at the end of posts by some users) were not removed because their content is deliberately chosen by the user. The use of signature blocks in Usenet is analogous to the use of formulaic expressions in other linguistic genres (e.g., greetings, farewells, sales transactions) that legitimately affect token frequency for constituent words.

Words are taken to be strings of characters separated from other strings by white space. In addition to space, tab, and newline, the character underscore (`_`) as well as all punctuation marks (`. ! ? : ; ,`) are treated as white spaces. However, apostrophe (`'`) and hyphen (`-`) are not. This means that web and email addresses are broken up into their component parts, whereas expressions such as *weren't* and *e-mail* are treated as single words. Lines starting with `http://` are eliminated beforehand. Capitalization is removed, so that instances of the same word in sentence-initial and sentence-medial position are tabulated together. Strings consisting entirely or partly of non-alphanumeric characters other than `$` and `@` (e.g., `#,%,&,*`) are removed. No further lemmatization of purely alphabetic strings was imposed, with the result that all related words (e.g., singular and plural) are treated as distinct.

### Text S2. Selection of target words

We are interested in words that first became popular during the lifetimes of the groups. Target words are selected that have negligible levels of use during the first 2.5 years of each group, and substantial use during the group's heyday. As shown in Figure 6CD (main text), in more recent times there is a clear reduction in the activity of the groups. Further analysis indicates that this reduction is accompanied by a concurrent deterioration in the informativeness of the postings. To avoid the selection of words used exclusively during this period, we require that at least 40% of target word uses occur prior to the time when the activity on the group fell to under a quarter of its peak level. This cutoff falls in 2005 for the `rec.music.hip-hop` group and 2007 for the `comp.os.linux.misc` group. In addition, we avoid the inclusion of words that are used predominately by single individuals, as we are interested in words that rose in the community more generally. Therefore, the following heuristics are adopted: no more than 20% of occurrences in a single month, no more than 40% of occurrences by a single user, and no more than 80% of occurrences by five users.

P-words are identified on a case-by-case basis among the most frequent words satisfying these criteria. S-words are identified with the help of dictionaries of Internet vocabulary and are selected from words with more than 100 appearances over the life time of the database. The following dictionaries of Usenet terms and Internet slang were used to identify words of interest: David Crystal's list of abbreviations, pp. 85-86 [1]; The Jargon File 4.3.3 [2]; the Wiktionary appendix on English Internet Slang [3]; and the Internet Slang Dictionary & Translator [4]. This leads to comparable counts for P-words and S-words in both groups, as shown in Tables S1-S4.

### Text S3. Trimming scheme

For each half-year time window, the data are trimmed as follows:

1. *Standardize user contribution per thread:* Combine all posts of the same user in the same thread and define it as a single post for the purpose of the following analysis. Then rank the users from  $i = 1$  to  $N$  and the threads from  $j = 1$  to  $M$ , starting from the ones with the largest number of posts. Two auxiliary vectors store the number of posts,  $\mathbf{u} = (u_i)$  and  $\mathbf{t} = (t_j)$ , where  $u_i$  is the number of posts of user  $i$  and  $t_j$  is the number of posts of thread  $j$ .
2. *Standardize the size of all posts:* Discard all posts smaller than the median in the window and randomly remove words from the others to redefine them to have exactly the same number of words, given by the median.
3. *Match number of users and threads:* Discard the set of  $N - M$  users with smallest number of posts if  $N > M$  and discard the set of  $M - N$  threads with smallest number of posts if  $N < M$ , choosing randomly among those with equal number of posts. Repeat the process recursively after discarding any user and thread that is left with no posts,

and update vectors  $\mathbf{u}$  and  $\mathbf{t}$ . This step facilitates convergence even though the equality between the number of users and threads will generally be violated in the next step.

4. *Match the size of all threads and users:* For rank  $i$ , remove a random set of  $u_i - t_i$  posts from user  $i$  if  $u_i > t_i$  and a random set of  $t_i - u_i$  posts from thread  $i$  if  $u_i < t_i$ . Starting from  $i = 1$ , proceed until all ranks have been considered.

5. *Match the low end of the distribution:* Apply steps 3 and 4 recursively to match the number of users and threads in the window under the additional constraint of having the exact same number of users and threads with a single post. To avoid depletion of the dataset, step 4 is in this case applied only to ranks in which the users or the threads have a single post.

Note that because the removals in step 4 are random to avoid sample biases, they also apply to posts from threads and/or users already treated and this will generally create a mismatch between the size of users and threads of same rank. As shown in Figures S2AB and S2DE for the half-year window centered on 1998-01-01, this mismatch is very small for both groups when compared to the original difference between the two distributions. Our definitions of word dissemination are not expected to be sensitive to such small differences. The only potential exception would be users and threads with single posts, since the words of such posts are not shuffled according to the baseline models used in the definition of  $\hat{D}^T$  and  $\hat{D}^U$ , respectively. This potential artifact is eliminated by step 5, which assures the same number of threads and users with one post. Our procedure leads to statistically significant trimmed datasets, as exemplified in Figure S2CF, where we show the number of posts as well as the number of users and threads for the non-overlapping half-year time windows used in our analysis.

- 
- [1] Crystal D (2006) Language and the Internet. Cambridge: Cambridge Univ. Press.
  - [2] Chester County InterLink, Jargon File text Archive, <http://jargon-file.org/archive/>. Retrieved Jan. 29, 2009.
  - [3] Wiktionary, [http://en.wiktionary.org/wiki/Appendix:Internet\\_slang](http://en.wiktionary.org/wiki/Appendix:Internet_slang). Retrieved Jan. 29, 2009.
  - [4] Internet Slang Dictionary & Translator, <http://www.noslang.com/dictionary>. Retrieved Jan. 29, 2009.

**Table S1: List of P-words in the comp.os.linux.misc group.** The total number of tokens  $N_w$ , users  $U_w$ , and threads  $T_w$  are calculated over the entire period, until 2008-03-31. The mean dissemination,  $\langle D_w^{U,T} \rangle$ , and standard deviation,  $\sigma_{D_w^{U,T}}$ , are calculated over all half-year windows that have  $N_w > 5$ , while  $\langle D_w^{U,T} \rangle_{\uparrow}$  is the average calculated over the windows in the *rising period*. The rising period is defined as the period that starts with the first window for which  $N_w > 5$  and lasts for the minimum between two years and half of the period to the window with the maximum frequency of the word. The centers of these windows are indicated by “Beginning” and “Peak”, respectively, and the frequency in the peak window by  $f_{peak}$ .

| Word       | $N_w$ | $U_w$ | $T_w$ | $\langle D_w^U \rangle_{\uparrow}$ | $\langle D_w^U \rangle$ | $\sigma_{D_w^U}$ | $\langle D_w^T \rangle_{\uparrow}$ | $\langle D_w^T \rangle$ | $\sigma_{D_w^T}$ | Beginning  | $f_{peak} \times 10^6$ | Peak       |
|------------|-------|-------|-------|------------------------------------|-------------------------|------------------|------------------------------------|-------------------------|------------------|------------|------------------------|------------|
| rpm        | 31910 | 6849  | 8439  | 0.63                               | 0.51                    | 0.08             | 0.51                               | 0.40                    | 0.08             | 1993-11-11 | 903.44                 | 2002-04-07 |
| kde        | 19236 | 5703  | 6726  | 0.54                               | 0.66                    | 0.10             | 0.32                               | 0.49                    | 0.11             | 1996-07-15 | 565.73                 | 2001-11-05 |
| suse       | 18776 | 5502  | 8057  | 0.78                               | 0.70                    | 0.08             | 0.75                               | 0.61                    | 0.09             | 1995-06-07 | 543.12                 | 2004-08-13 |
| gnome      | 11811 | 3853  | 4421  | 0.46                               | 0.67                    | 0.10             | 0.34                               | 0.49                    | 0.08             | 1997-07-28 | 399.05                 | 2000-09-01 |
| mandrake   | 11621 | 3870  | 5660  | 0.75                               | 0.71                    | 0.08             | 0.70                               | 0.66                    | 0.07             | 1998-08-11 | 535.98                 | 2002-06-16 |
| usb        | 10917 | 2312  | 2868  | 0.66                               | 0.54                    | 0.09             | 0.57                               | 0.42                    | 0.11             | 1996-10-21 | 698.41                 | 2007-03-14 |
| deja       | 8520  | 3202  | 5654  | 0.77                               | 0.83                    | 0.09             | 0.80                               | 0.89                    | 0.12             | 1996-04-15 | 913.20                 | 2000-11-13 |
| google     | 7230  | 2200  | 4069  | 0.89                               | 0.81                    | 0.10             | 0.89                               | 0.81                    | 0.11             | 1999-02-17 | 580.03                 | 2006-06-07 |
| ssh        | 7213  | 2083  | 2478  | 0.72                               | 0.61                    | 0.08             | 0.60                               | 0.46                    | 0.09             | 1995-11-25 | 337.65                 | 2002-12-06 |
| xp         | 5844  | 1964  | 2068  | 0.54                               | 0.69                    | 0.19             | 0.53                               | 0.48                    | 0.12             | 1994-06-30 | 445.49                 | 2005-05-09 |
| grub       | 5555  | 1238  | 1339  | 0.61                               | 0.55                    | 0.11             | 0.57                               | 0.37                    | 0.11             | 1996-10-28 | 436.48                 | 2006-03-28 |
| mozilla    | 5487  | 1614  | 2106  | 0.81                               | 0.63                    | 0.13             | 0.86                               | 0.57                    | 0.16             | 1995-05-18 | 354.18                 | 2002-09-04 |
| win98      | 5472  | 2513  | 2526  | 0.57                               | 0.67                    | 0.11             | 0.45                               | 0.55                    | 0.09             | 1997-06-18 | 275.55                 | 2000-02-27 |
| raid       | 5381  | 1448  | 1608  | 0.62                               | 0.51                    | 0.13             | 0.44                               | 0.38                    | 0.10             | 1994-02-21 | 223.19                 | 2004-11-22 |
| hash       | 5092  | 707   | 2735  | 0.56                               | 0.39                    | 0.20             | 0.79                               | 0.68                    | 0.13             | 1994-05-04 | 432.71                 | 2004-05-09 |
| gnupg      | 4988  | 260   | 2177  | 0.12                               | 0.23                    | 0.17             | 0.76                               | 0.66                    | 0.15             | 1998-10-07 | 701.43                 | 2004-07-17 |
| fedora     | 4818  | 1299  | 2248  | 0.46                               | 0.69                    | 0.13             | 0.41                               | 0.64                    | 0.13             | 2003-04-26 | 437.25                 | 2004-12-18 |
| fat32      | 4478  | 1883  | 1803  | 0.63                               | 0.65                    | 0.09             | 0.35                               | 0.47                    | 0.09             | 1996-05-10 | 137.98                 | 1998-05-10 |
| rpms       | 4440  | 2013  | 2586  | 0.64                               | 0.68                    | 0.10             | 0.63                               | 0.64                    | 0.10             | 1995-09-08 | 121.04                 | 2001-01-23 |
| glibc      | 4300  | 1659  | 1964  | 0.57                               | 0.60                    | 0.09             | 0.54                               | 0.51                    | 0.10             | 1994-06-12 | 151.22                 | 1998-04-21 |
| dvd        | 4297  | 1313  | 1417  | 0.53                               | 0.57                    | 0.09             | 0.32                               | 0.39                    | 0.08             | 1997-04-23 | 321.90                 | 2006-10-11 |
| staroffice | 3997  | 1885  | 1652  | 0.65                               | 0.70                    | 0.10             | 0.43                               | 0.49                    | 0.11             | 1995-12-19 | 128.05                 | 1999-12-01 |
| sha1       | 3946  | 268   | 2272  | 0.15                               | 0.22                    | 0.13             | 0.79                               | 0.77                    | 0.13             | 1997-09-06 | 419.87                 | 2004-05-09 |
| ext3       | 3945  | 1107  | 1256  | 0.57                               | 0.57                    | 0.09             | 0.52                               | 0.42                    | 0.10             | 1999-07-31 | 309.17                 | 2006-11-30 |
| cdrecord   | 3909  | 953   | 1023  | 0.35                               | 0.39                    | 0.09             | 0.35                               | 0.30                    | 0.09             | 1997-01-28 | 185.59                 | 2002-11-22 |
| icq        | 3798  | 911   | 2149  | 0.41                               | 0.36                    | 0.13             | 0.68                               | 0.70                    | 0.14             | 1997-03-20 | 172.46                 | 2001-04-06 |
| vmware     | 3705  | 1076  | 1117  | 0.53                               | 0.51                    | 0.09             | 0.41                               | 0.33                    | 0.08             | 1998-12-19 | 150.95                 | 2004-01-01 |
| ubuntu     | 3411  | 854   | 1207  | 0.44                               | 0.60                    | 0.15             | 0.44                               | 0.48                    | 0.09             | 2004-07-13 | 524.59                 | 2006-12-04 |
| gimp       | 3405  | 1394  | 1320  | 0.51                               | 0.61                    | 0.11             | 0.44                               | 0.46                    | 0.11             | 1995-08-27 | 130.43                 | 1998-05-09 |
| pdf        | 3386  | 1137  | 1007  | 0.59                               | 0.59                    | 0.09             | 0.35                               | 0.36                    | 0.10             | 1995-06-18 | 168.45                 | 2003-02-22 |
| fetchmail  | 3321  | 975   | 799   | 0.54                               | 0.46                    | 0.17             | 0.39                               | 0.30                    | 0.13             | 1996-07-26 | 226.24                 | 2003-10-05 |
| dhcp       | 3270  | 1281  | 1224  | 0.52                               | 0.59                    | 0.07             | 0.35                               | 0.42                    | 0.08             | 1995-06-02 | 135.60                 | 2002-06-17 |
| mp3        | 3182  | 1286  | 1273  | 0.60                               | 0.63                    | 0.10             | 0.44                               | 0.45                    | 0.10             | 1996-10-11 | 173.92                 | 2007-02-17 |
| knoppix    | 3070  | 794   | 1188  | 0.64                               | 0.61                    | 0.11             | 0.45                               | 0.51                    | 0.12             | 2002-06-16 | 290.46                 | 2004-12-23 |
| mysql      | 2972  | 1128  | 977   | 0.60                               | 0.59                    | 0.09             | 0.41                               | 0.39                    | 0.07             | 1996-09-17 | 165.58                 | 2005-03-21 |
| gentoo     | 2631  | 643   | 1210  | 0.86                               | 0.52                    | 0.16             | 0.72                               | 0.56                    | 0.10             | 2001-11-13 | 188.13                 | 2002-09-03 |
| cnet       | 2627  | 1448  | 1969  | 0.64                               | 0.78                    | 0.22             | 0.61                               | 0.79                    | 0.20             | 1997-04-27 | 398.87                 | 2000-04-14 |
| nvidia     | 2481  | 851   | 881   | 0.70                               | 0.59                    | 0.11             | 0.56                               | 0.44                    | 0.11             | 1997-07-21 | 149.45                 | 2007-04-11 |

**Table S2: List of S-words in the comp.os.linux.misc group.** The definitions are the same as in Table S1.

| Word     | $N_w$ | $U_w$ | $T_w$ | $\langle D_w^U \rangle_{\uparrow}$ | $\langle D_w^U \rangle$ | $\sigma_{D_w^U}$ | $\langle D_w^T \rangle_{\uparrow}$ | $\langle D_w^T \rangle$ | $\sigma_{D_w^T}$ | Beginning  | $f_{\text{peak}} \times 10^6$ | Peak       |
|----------|-------|-------|-------|------------------------------------|-------------------------|------------------|------------------------------------|-------------------------|------------------|------------|-------------------------------|------------|
| distro   | 9796  | 2778  | 5016  | 0.63                               | 0.65                    | 0.07             | 0.70                               | 0.68                    | 0.08             | 1997-05-03 | 470.13                        | 2006-05-13 |
| hth      | 7117  | 1678  | 6474  | 0.52                               | 0.46                    | 0.10             | 1.04                               | 1.08                    | 0.05             | 1994-12-15 | 230.51                        | 2007-04-01 |
| distros  | 4417  | 1491  | 2645  | 0.67                               | 0.68                    | 0.08             | 0.77                               | 0.72                    | 0.06             | 1997-11-17 | 252.92                        | 2006-11-25 |
| iirc     | 3481  | 1198  | 2819  | 0.73                               | 0.64                    | 0.11             | 0.89                               | 0.91                    | 0.05             | 1995-06-05 | 113.62                        | 2004-11-09 |
| troll    | 3140  | 1232  | 1188  | 0.64                               | 0.70                    | 0.14             | 0.46                               | 0.48                    | 0.12             | 1994-02-15 | 270.72                        | 2005-06-20 |
| spammers | 2404  | 570   | 1155  | 0.41                               | 0.46                    | 0.20             | 0.71                               | 0.59                    | 0.17             | 1996-09-29 | 185.52                        | 2003-07-03 |
| lol      | 961   | 518   | 685   | 0.89                               | 0.78                    | 0.14             | 0.86                               | 0.79                    | 0.11             | 1997-07-25 | 59.14                         | 2006-11-16 |
| y2k      | 910   | 326   | 332   | 0.56                               | 0.51                    | 0.17             | 0.31                               | 0.42                    | 0.17             | 1996-10-03 | 59.45                         | 1999-10-24 |
| plonk    | 634   | 264   | 420   | 0.70                               | 0.70                    | 0.19             | 0.71                               | 0.73                    | 0.15             | 1997-07-24 | 62.17                         | 2005-08-13 |
| boxen    | 580   | 264   | 460   | 0.81                               | 0.69                    | 0.20             | 0.93                               | 0.84                    | 0.10             | 1994-11-08 | 42.37                         | 2001-04-24 |
| wtf      | 383   | 249   | 310   | 0.85                               | 0.86                    | 0.15             | 0.69                               | 0.87                    | 0.14             | 1995-06-23 | 30.42                         | 2006-04-11 |
| eula     | 378   | 154   | 164   | 0.46                               | 0.61                    | 0.20             | 0.28                               | 0.49                    | 0.25             | 1997-07-02 | 39.68                         | 2005-07-10 |
| bsod     | 278   | 167   | 132   | 0.76                               | 0.77                    | 0.20             | 0.49                               | 0.58                    | 0.25             | 1997-08-08 | 19.36                         | 2002-07-29 |
| istr     | 275   | 128   | 253   | 0.76                               | 0.70                    | 0.19             | 0.91                               | 0.94                    | 0.09             | 1996-12-20 | 20.11                         | 2004-12-25 |
| blog     | 227   | 86    | 139   | 0.34                               | 0.49                    | 0.16             | 0.43                               | 0.63                    | 0.20             | 2003-11-15 | 31.30                         | 2006-08-29 |
| addy     | 126   | 84    | 99    | 0.78                               | 0.74                    | 0.19             | 0.87                               | 0.77                    | 0.17             | 1998-04-07 | 7.19                          | 2004-05-02 |
| ianal    | 113   | 80    | 69    | 0.84                               | 0.82                    | 0.17             | 0.48                               | 0.54                    | 0.17             | 1998-01-09 | 11.68                         | 2004-12-24 |

**Table S3: List of P-words in the rec.music.hip-hop group.** The definitions are the same as in Table S1.

| Word      | $N_w$ | $U_w$ | $T_w$ | $\langle D_w^U \rangle_{\uparrow}$ | $\langle D_w^U \rangle$ | $\sigma_{D_w^U}$ | $\langle D_w^T \rangle_{\uparrow}$ | $\langle D_w^T \rangle$ | $\sigma_{D_w^T}$ | Beginning  | $f_{\text{peak}} \times 10^6$ | Peak       |
|-----------|-------|-------|-------|------------------------------------|-------------------------|------------------|------------------------------------|-------------------------|------------------|------------|-------------------------------|------------|
| rmhh      | 19790 | 1308  | 8823  | 0.64                               | 0.51                    | 0.14             | 0.78                               | 0.75                    | 0.09             | 1995-05-10 | 2500.78                       | 2005-05-08 |
| eminem    | 12363 | 2061  | 4439  | 0.36                               | 0.79                    | 0.15             | 0.59                               | 0.55                    | 0.07             | 1997-10-16 | 629.58                        | 1999-01-08 |
| mos       | 10405 | 1430  | 4457  | 0.56                               | 0.69                    | 0.18             | 0.58                               | 0.64                    | 0.10             | 1996-04-10 | 844.10                        | 1999-12-24 |
| bush      | 8031  | 1101  | 2465  | 0.85                               | 0.66                    | 0.16             | 0.79                               | 0.56                    | 0.18             | 1995-05-10 | 118.70                        | 2004-10-23 |
| kweli     | 3737  | 842   | 1735  | 0.42                               | 0.70                    | 0.13             | 0.57                               | 0.59                    | 0.11             | 1997-09-07 | 232.48                        | 1998-11-18 |
| iraq      | 3428  | 519   | 853   | 0.53                               | 0.53                    | 0.15             | 0.59                               | 0.41                    | 0.20             | 1995-12-19 | 422.75                        | 2004-12-08 |
| doom      | 3096  | 560   | 1605  | 0.88                               | 0.61                    | 0.17             | 0.85                               | 0.61                    | 0.13             | 1995-05-10 | 200.82                        | 2005-12-18 |
| cent      | 2775  | 637   | 1641  | 0.86                               | 0.77                    | 0.15             | 0.82                               | 0.77                    | 0.14             | 1995-05-10 | 564.05                        | 2005-09-07 |
| pun       | 2707  | 970   | 1566  | 0.97                               | 0.83                    | 0.11             | 0.96                               | 0.73                    | 0.16             | 1995-05-10 | 153.58                        | 1998-07-17 |
| peas      | 2675  | 452   | 1664  | 0.96                               | 0.59                    | 0.25             | 1.01                               | 0.76                    | 0.11             | 1995-07-02 | 362.22                        | 2000-08-03 |
| dvd       | 2450  | 579   | 1128  | 0.41                               | 0.62                    | 0.16             | 0.43                               | 0.53                    | 0.11             | 1997-08-05 | 178.87                        | 2006-05-13 |
| icq       | 2302  | 257   | 1586  | 0.42                               | 0.38                    | 0.23             | 0.89                               | 0.70                    | 0.23             | 1997-08-08 | 197.85                        | 1998-11-02 |
| ja        | 2266  | 776   | 1242  | 0.84                               | 0.79                    | 0.13             | 0.77                               | 0.67                    | 0.12             | 1995-05-10 | 177.05                        | 2002-10-16 |
| talib     | 2225  | 700   | 1259  | 0.48                               | 0.75                    | 0.15             | 0.61                               | 0.66                    | 0.09             | 1997-09-05 | 111.60                        | 1999-04-23 |
| kanye     | 2199  | 363   | 863   | 0.62                               | 0.66                    | 0.08             | 0.57                               | 0.54                    | 0.09             | 2001-06-23 | 353.47                        | 2004-04-24 |
| dilated   | 1916  | 519   | 1117  | 0.47                               | 0.68                    | 0.15             | 0.82                               | 0.68                    | 0.14             | 1997-05-12 | 152.49                        | 2000-09-09 |
| slug      | 1813  | 335   | 842   | 0.40                               | 0.54                    | 0.16             | 1.01                               | 0.62                    | 0.23             | 1995-06-02 | 173.65                        | 1999-11-26 |
| google    | 1787  | 546   | 1256  | 0.84                               | 0.90                    | 0.13             | 0.79                               | 0.82                    | 0.06             | 2000-05-05 | 275.06                        | 2005-10-29 |
| jigga     | 1702  | 486   | 915   | 0.81                               | 0.62                    | 0.19             | 0.74                               | 0.63                    | 0.13             | 1997-09-30 | 139.23                        | 2006-12-09 |
| riaa      | 1346  | 304   | 649   | 0.60                               | 0.62                    | 0.24             | 0.38                               | 0.53                    | 0.23             | 1997-12-10 | 127.27                        | 1998-11-11 |
| kobe      | 1234  | 346   | 370   | 0.67                               | 0.63                    | 0.17             | 0.37                               | 0.43                    | 0.22             | 1996-11-10 | 96.82                         | 2000-04-09 |
| neptunes  | 1218  | 371   | 580   | 0.82                               | 0.75                    | 0.13             | 0.68                               | 0.60                    | 0.14             | 1999-04-28 | 127.97                        | 2002-09-09 |
| necro     | 1193  | 360   | 596   | 0.50                               | 0.62                    | 0.12             | 0.50                               | 0.55                    | 0.13             | 1996-11-21 | 60.96                         | 2000-11-03 |
| lif       | 1146  | 220   | 574   | 0.52                               | 0.53                    | 0.18             | 0.73                               | 0.64                    | 0.18             | 1997-01-18 | 155.86                        | 2002-06-24 |
| anticon   | 1129  | 324   | 457   | 0.49                               | 0.64                    | 0.12             | 0.59                               | 0.48                    | 0.14             | 1998-08-08 | 91.95                         | 2000-05-09 |
| blackstar | 1081  | 378   | 675   | 0.63                               | 0.79                    | 0.13             | 0.71                               | 0.72                    | 0.15             | 1997-12-05 | 116.90                        | 1998-12-11 |
| blueprint | 1080  | 368   | 577   | 0.84                               | 0.75                    | 0.14             | 0.76                               | 0.68                    | 0.16             | 1995-05-10 | 135.10                        | 2001-11-30 |
| saddam    | 1005  | 243   | 278   | 0.81                               | 0.51                    | 0.18             | 0.63                               | 0.39                    | 0.17             | 1996-01-29 | 181.55                        | 2003-01-25 |

**Table S4: List of S-words in the rec.music.hip-hop group.** The definitions are the same as in Table S1.

| Word     | $N_w$ | $U_w$ | $T_w$ | $\langle D_w^U \rangle_{\uparrow}$ | $\langle D_w^U \rangle$ | $\sigma_{D_w^U}$ | $\langle D_w^T \rangle_{\uparrow}$ | $\langle D_w^T \rangle$ | $\sigma_{D_w^T}$ | Beginning  | $f_{\text{peak}} \times 10^6$ | Peak       |
|----------|-------|-------|-------|------------------------------------|-------------------------|------------------|------------------------------------|-------------------------|------------------|------------|-------------------------------|------------|
| lol      | 8196  | 1452  | 5112  | 0.72                               | 0.68                    | 0.09             | 0.86                               | 0.84                    | 0.07             | 1996-05-31 | 506.44                        | 2005-10-26 |
| ot       | 2692  | 532   | 1655  | 0.88                               | 0.62                    | 0.18             | 0.95                               | 0.79                    | 0.15             | 1995-06-27 | 167.81                        | 2000-09-29 |
| troll    | 1766  | 597   | 883   | 0.82                               | 0.72                    | 0.18             | 0.64                               | 0.59                    | 0.12             | 1995-12-25 | 123.23                        | 2006-01-06 |
| wtf      | 1544  | 577   | 1252  | 0.65                               | 0.75                    | 0.11             | 0.83                               | 0.87                    | 0.10             | 1996-10-15 | 74.42                         | 2005-10-11 |
| chicks   | 1406  | 524   | 934   | 0.88                               | 0.79                    | 0.12             | 0.87                               | 0.76                    | 0.11             | 1995-05-10 | 71.91                         | 2004-02-09 |
| prolly   | 1115  | 281   | 943   | 0.82                               | 0.57                    | 0.18             | 0.92                               | 0.90                    | 0.07             | 1995-05-10 | 54.27                         | 2000-08-07 |
| copped   | 1013  | 344   | 836   | 0.83                               | 0.67                    | 0.15             | 0.96                               | 0.87                    | 0.07             | 1996-09-17 | 79.43                         | 2006-05-08 |
| bling    | 780   | 279   | 358   | 0.52                               | 0.66                    | 0.14             | 0.54                               | 0.57                    | 0.16             | 1999-03-24 | 62.76                         | 2000-12-19 |
| arse     | 765   | 202   | 623   | 0.67                               | 0.59                    | 0.24             | 0.93                               | 0.88                    | 0.10             | 1997-03-08 | 75.37                         | 1999-10-03 |
| ps2      | 564   | 172   | 157   | 0.60                               | 0.58                    | 0.14             | 0.24                               | 0.35                    | 0.17             | 1999-06-18 | 60.97                         | 2002-01-03 |
| trolls   | 473   | 232   | 325   | 0.88                               | 0.79                    | 0.16             | 0.85                               | 0.73                    | 0.12             | 1997-08-13 | 41.90                         | 2004-04-27 |
| otp      | 402   | 180   | 280   | 0.60                               | 0.71                    | 0.15             | 0.65                               | 0.74                    | 0.12             | 1998-01-13 | 28.60                         | 1999-12-11 |
| iirc     | 397   | 132   | 363   | 0.56                               | 0.62                    | 0.17             | 0.94                               | 0.95                    | 0.06             | 1999-02-06 | 55.81                         | 2006-06-05 |
| congrats | 332   | 196   | 234   | 0.92                               | 0.91                    | 0.14             | 0.95                               | 0.76                    | 0.18             | 1998-02-01 | 49.09                         | 2006-07-31 |
| lmao     | 330   | 155   | 289   | 0.69                               | 0.70                    | 0.17             | 0.90                               | 0.90                    | 0.09             | 1998-02-23 | 21.08                         | 2003-11-18 |
| twat     | 278   | 131   | 226   | 0.62                               | 0.71                    | 0.18             | 0.94                               | 0.85                    | 0.15             | 1997-03-31 | 55.37                         | 2006-10-16 |
| arsed    | 224   | 91    | 207   | 0.53                               | 0.67                    | 0.18             | 0.94                               | 0.93                    | 0.10             | 1998-04-21 | 24.48                         | 2006-12-31 |
| innit    | 212   | 85    | 195   | 0.49                               | 0.63                    | 0.15             | 0.94                               | 0.95                    | 0.05             | 1998-03-05 | 33.13                         | 2005-12-25 |
| addy     | 202   | 135   | 167   | 0.79                               | 0.81                    | 0.13             | 0.90                               | 0.83                    | 0.12             | 1998-04-28 | 15.32                         | 2005-01-22 |
| omg      | 194   | 66    | 145   | 0.40                               | 0.55                    | 0.25             | 0.88                               | 0.82                    | 0.22             | 1999-12-17 | 34.59                         | 2005-09-27 |
| lurker   | 178   | 138   | 149   | 0.93                               | 0.92                    | 0.09             | 0.82                               | 0.82                    | 0.14             | 1997-10-15 | 8.84                          | 2005-05-21 |
| kfc      | 142   | 87    | 82    | 0.56                               | 0.70                    | 0.21             | 0.49                               | 0.60                    | 0.24             | 1998-03-21 | 11.67                         | 2003-10-12 |
| plonk    | 135   | 90    | 94    | 0.73                               | 0.80                    | 0.17             | 0.57                               | 0.71                    | 0.18             | 2001-08-04 | 23.19                         | 2005-07-08 |
| afaik    | 131   | 79    | 123   | 0.81                               | 0.77                    | 0.18             | 0.90                               | 0.93                    | 0.09             | 2000-01-05 | 17.04                         | 2006-05-31 |
| roflmao  | 108   | 60    | 96    | 0.59                               | 0.64                    | 0.15             | 0.91                               | 0.85                    | 0.20             | 1998-01-07 | 6.38                          | 2000-08-20 |
| yuo      | 107   | 45    | 85    | 0.88                               | 0.43                    | 0.24             | 0.86                               | 0.81                    | 0.26             | 1998-01-20 | 13.45                         | 2005-02-15 |
| snas     | 106   | 56    | 57    | 0.64                               | 0.64                    | 0.21             | 0.46                               | 0.48                    | 0.13             | 1998-04-07 | 12.19                         | 2001-08-25 |
| wmd      | 104   | 42    | 45    | 0.57                               | 0.51                    | 0.20             | 0.48                               | 0.45                    | 0.21             | 2002-10-30 | 16.56                         | 2005-08-04 |
| wank     | 104   | 61    | 78    | 0.49                               | 0.69                    | 0.20             | 0.61                               | 0.74                    | 0.18             | 1998-09-14 | 14.62                         | 2002-07-24 |
| rotflmao | 100   | 56    | 85    | 0.81                               | 0.69                    | 0.24             | 0.83                               | 0.82                    | 0.14             | 1998-03-02 | 12.47                         | 2004-07-01 |

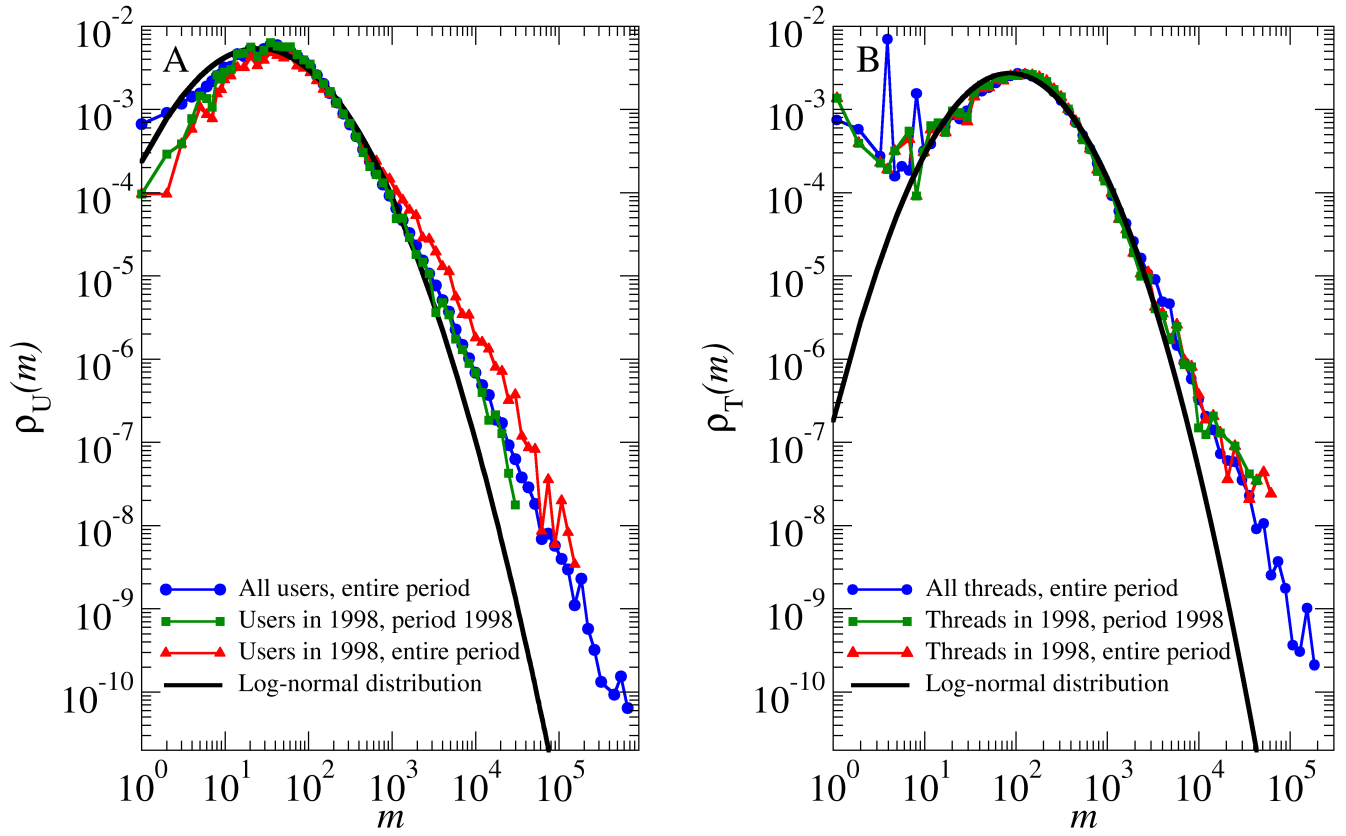

**Figure S1: Word distributions per user and per thread in the comp.os.linux.misc group.** **A**, Probability density function of users that contributed  $m$  words to the text. Blue: all users in the entire database. Green: users active in the half-year window centered on 1998-01-01, words in posts during the same half-year window. Red: users active in the half-year window centered on 1998-01-01, words in posts for these users over the lifetime of the database. Black: log-normal distribution obtained by fitting the two first moments of the green distribution. **B**, The same as in panel **A** for threads. Logarithmic bin sizes used in all cases. Similar results are found for the rec.music.hip-hop group.

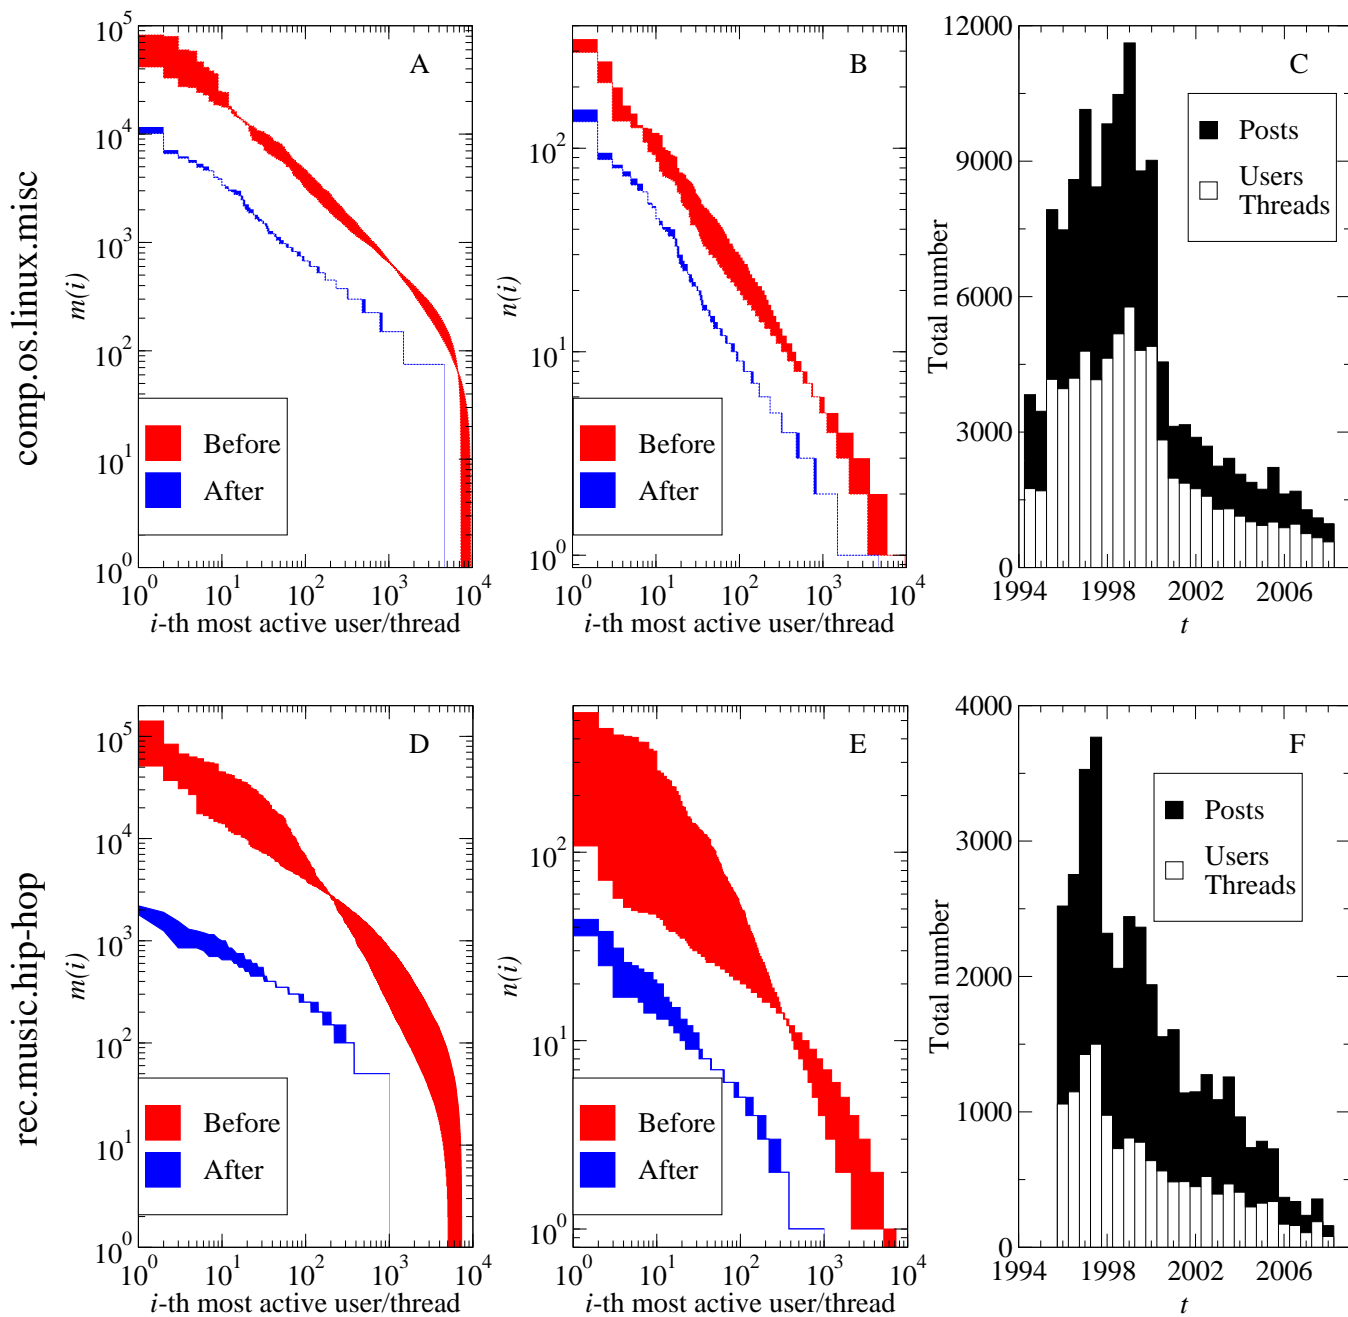

**Figure S2: Distributions for the trimmed datasets of the `comp.os.linux.misc` and `rec.music.hip-hop` groups.** **A,D**, Difference between the number  $m$  of words of the  $i$ -th most active user and thread before and after trimming for a typical half-year window, centered on 1998-01-01. **B,E**, Difference between the number  $n$  of posts of the  $i$ -th most active user and the  $i$ -th most active thread, calculated both before and after trimming for the window centered on 1998-01-01. **C,F**, Number of posts and number of users in the trimmed datasets for each non-overlapping half-year window centered at  $t$ . The number of threads is equal to the number of users in the trimmed datasets.



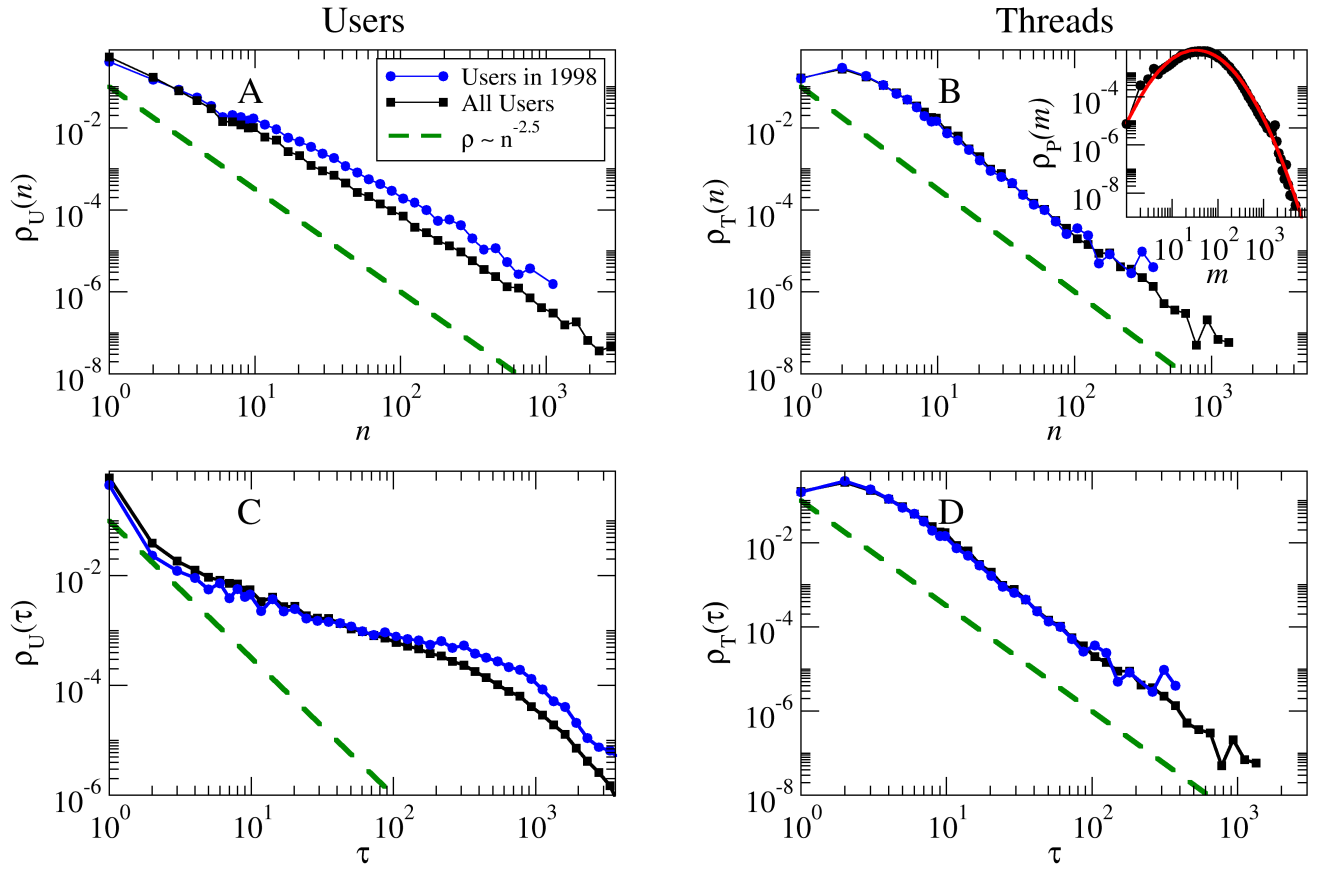

**Figure S3: Analysis of user and thread activity in the comp.os.linux.misc group.** **A,B**, Distribution of users with  $n$  posts (**A**) and of threads with  $n$  posts (**B**). Inset: distribution of the number of words per post with a log-normal fit (red line). **C,D**, Distribution of users with activity interval  $\tau$  (**C**) and of threads with activity interval  $\tau$  (**D**), where the activity interval is expressed as the number of days between the first and the last post. Blue lines: activity over the entire database of users and threads active in the half-year window centered on 1998-01-01. Black lines: activity of all users and threads in the database. Green dashed lines: power law with an exponent  $\alpha = -2.5$ , provided as a visual reference for the tails of the distributions. In panels **A,C**, the difference between the tails of the blue and black curves arises because the set of users active in the 1998-01-01 window, which is early in the lifetime of the group, have more opportunity to contribute a large number of posts than users joining the discussion group later. Logarithmic binning is used in all cases. Similar results are found for the rec.music.hip-hop group.
